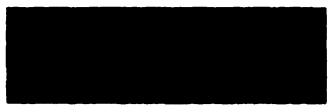

# Physiological variations in thyroid hormones: physiological and pathophysiological considerations

DELBERT A. FISHER

Thyroid hormone production is regulated via pituitary thyrotropin (TSH) modulation of thyroxine ( $T_4$ ) prohormone secretion by the thyroid gland and regulation of active triiodothyronine ( $T_3$ ) production in peripheral tissues via metabolic events influencing activities of the iodothyronine monodeiodinase enzyme systems. Control at both levels is developmentally regulated and modified in serious nonthyroidal illness (trauma, infection, cancer, metabolic diseases). Racial and gender differences are of little significance except for the effects of placental estrogens and chorionic gonadotropin during pregnancy. There is a circadian rhythm of TSH secretion, with peak values at the onset of sleep and nadir concentrations during the afternoon hours. Peak and nadir concentrations differ by  $\sim \pm 50\%$ . The effect on circulating  $T_4$  and  $T_3$  concentrations is not significant because of the large size of the extrathyroidal  $T_4$  pool. In healthy subjects there is no significant impact of body weight, physical training, body habitus, posture, immobilization, exercise, or ambulatory status on thyroid function, and no significant geographic environmental variation. Nutrition also has a minimal impact except for variation in iodine intake. Subthreshold concentrations of iodine intake are associated with increased TSH secretion, goiter, increased thyroid iodine uptake, decreased  $T_4$  production, an increased  $T_3/T_4$  secretion ratio, and an increased ratio of circulating  $T_3/T_4$  concentrations. Excessive iodine intake can block thyroid hormone biosynthesis by inhibiting the enzymes involved in the biosynthetic process, resulting in reduced  $T_4$  secretion, increased TSH concentrations, goiter, and hypothyroidism if the iodine excess is chronic.

**INDEXING TERMS:** thyrotropin • triiodothyronine • thyroxine • hormone regulation

Thyroid gland function is regulated by thyrotropin (TSH) secretion from the pituitary gland [1].<sup>1</sup> TSH secretion in turn is largely regulated by hypothalamic thyroliberin (TRH) secreted into the pituitary portal vascular system to stimulate pituitary gland TSH release, and by a feedback-inhibiting loop whereby free thyroxine ( $FT_4$ ) acts at both the pituitary and hypothalamic levels [where it is converted to the active hormone triiodothyronine ( $T_3$ )] to inhibit TSH and TRH production, respectively. TSH stimulates the synthesis and secretion of the prohormone  $T_4$ , which circulates bound to binding proteins in serum. The most important of these binding proteins is thyroxine-binding globulin (TBG), but transthyretin (prealbumin) and albumin play secondary roles.  $T_4$  is distributed to peripheral tissues, where it is metabolized by deiodination to  $T_3$  by the iodothyronine monodeiodinases (MDIs) type I and type II [2]. Most of the circulating  $T_3$  appears to be derived via hepatic monodeiodination of  $T_4$  by type I MDI. Type II MDI produces  $T_3$  for local action in brain, pituitary, and brown adipose tissue.  $T_4$  also is deiodinated to inactive "reverse"  $T_3$  ( $rT_3$ ) by a type III MDI in most nonhepatic tissues, and  $T_4$  can be sulfoconjugated, glucuronide conjugated, and (or) deaminated to the thyroacetic and thyropropionic acid derivatives. Of all the metabolites, only  $T_3$  and triiodothyroacetic acid manifest bioactivity.

All of the hormones can be measured in peripheral blood. However, measurements of TRH, the sulfate and glucuronide conjugates, and triiodothyroacetic acid have little or no clinical application at the present time. The most important in vitro measurements for routine clinical use include TSH and a direct or indirect measurement of  $FT_4$ . The latter include the  $T_3$  resin uptake and variations. Other measurements include  $T_3$ , free  $T_3$  ( $FT_3$ ),  $rT_3$ , TBG, and thyroglobulin.

**PHYSIOLOGICAL VARIATIONS WITH GENDER, RACE, AND AGE**  
There are marked variations in thyroid function with age, evident in all of the in vitro hormone and protein measurements. These variations are summarized in Table 1 [3-6]. Thyroid

Corning Nichols Institute, San Juan Capistrano, CA 92690. Fax 714-728-4960.

Received July 31, 1995; accepted October 13, 1995.

<sup>1</sup> Nonstandard abbreviations: TSH, thyrotropin; TRH, thyroliberin;  $T_4$ , thyroxine;  $T_3$ , triiodothyronine; TBG, thyroxine-binding globulin; MDI, iodothyronine monodeiodinase;  $rT_3$ , reverse  $T_3$ ;  $FT_4$  (or  $FT_3$ ), free  $T_4$  (or free  $T_3$ ); and hCG, human chorionic gonadotropin.

**Table 1. Changes in thyroid-function indicators with age.<sup>a</sup>**

|               | Serum conc              |                          |            |           |                         |                          |          | T <sub>4</sub> utilization, µg/kg per day |
|---------------|-------------------------|--------------------------|------------|-----------|-------------------------|--------------------------|----------|-------------------------------------------|
|               | T <sub>4</sub> , nmol/L | FT <sub>4</sub> , pmol/L | TSH, mIU/L | TBG, mg/L | T <sub>3</sub> , nmol/L | rT <sub>3</sub> , nmol/L | Tg, µg/L |                                           |
| <i>Fetus</i>  |                         |                          |            |           |                         |                          |          |                                           |
| 12–20 weeks   | 5–50                    | 0–50                     | 1–8        | 2–23      | 0.5                     | —                        | —        | 1                                         |
| 21–30 weeks   | 35–100                  | 5–12                     | 1.9–8.8    | 8–33      | 0.10–0.75               | —                        | 6–230    | 2                                         |
| 31–40 weeks   | 70–180                  | 12–22                    | 3–12       | 15–50     | 0.2–1.5                 | 1.5–7.7                  | 2–54     | 5                                         |
| <i>Infant</i> |                         |                          |            |           |                         |                          |          |                                           |
| 1–4 days      | 142–277                 | 28–68                    | 1–39       | 22–42     | 1.5–11.4                | —                        | 2–110    | 10                                        |
| 1–4 weeks     | 106–221                 | 12–30                    | 1.7–9.1    | —         | 1.6–5.3                 | 0.4–4.5                  | —        | 7                                         |
| 1–12 months   | 76–210                  | 10–23                    | 0.8–8.2    | 16–36     | 1.6–3.8                 | 0.17–2.0                 | —        | 6                                         |
| <i>Child</i>  |                         |                          |            |           |                         |                          |          |                                           |
| 1–5 years     | 94–193                  | 10–27                    | 0.7–5.7    | 12–28     | 1.6–4.1                 | 0.23–1.1                 | 2–65     | 5                                         |
| 6–10 years    | 82–171                  | 13–27                    | 0.7–5.7    | 12–28     | 1.4–3.7                 | 0.26–1.2                 | 2–65     | 4                                         |
| 11–15 years   | 71–151                  | 10–26                    | 0.7–5.7    | 14–30     | 1.3–3.3                 | 0.29–1.3                 | 2–36     | 3                                         |
| 16–20 years   | 54–152                  | 10–26                    | 0.7–5.7    | 14–30     | 1.2–3.2                 | 0.39–1.2                 | 2–36     | 2                                         |
| <i>Adult</i>  |                         |                          |            |           |                         |                          |          |                                           |
| 21–50 years   | 55–161                  | 12–32                    | 0.4–4.2    | 17–36     | 1.1–3.1                 | 0.46–1.2                 | 2–25     | 1.5                                       |
| 51–80 years   | 55–160                  | 12–32                    | 0.4–4.2    | 17–36     | 0.6–2.8                 | 0.46–1.2                 | 2–25     | 1.5                                       |

<sup>a</sup>Data from refs. 3–6 and Coming Nichols Institute Clinical Correlations Division. Values are 2 SD range.

function in the fetus matures progressively to maximum levels of thyroid hormone production and utilization (per kilogram of body weight) in early infancy [3, 4]. T<sub>4</sub>, T<sub>3</sub>, FT<sub>4</sub>, FT<sub>3</sub>, and TSH concentrations all are highest during this period, as are T<sub>4</sub> utilization and presumably production rate.

T<sub>4</sub> utilization rates decrease progressively with age after birth [6]; other indicators decrease more modestly. In adults ages 20 to 50 years there are no changes with age in serum T<sub>4</sub>, FT<sub>4</sub>, or TSH concentrations, but modest decreases in T<sub>3</sub> and T<sub>4</sub> utilization are observed [7]. In subjects >50 years, there are a variety of progressive changes in hypothalamic–pituitary thyroid axis function, as summarized in Table 2 [7]. The net effect of these changes on circulating thyroid T<sub>4</sub> and TSH concentrations is minimal. There is a modest, progressive decrease in serum T<sub>3</sub> concentrations.

Recent studies show little variation in serum TSH or FT<sub>4</sub> concentrations during the hormonal changes of puberty [5]. In general, thyroid-function indicators in healthy subjects show little or no clinically significant gender or racial variation. Estrogen increases serum TBG concentrations by enhancing hepatic sialylation of the molecule, which reduces

metabolic clearance; androgens reduce circulating TBG concentrations [2]. However, these are predominantly pharmacologic effects manifest during drug administration (contraceptive or other therapeutic uses) or during pregnancy in women.

#### DIETARY INFLUENCES, NUTRITION

Caloric restriction tends to reduce thyroid function, with effects at both the hypothalamic–pituitary and peripheral tissue levels. Basal and TRH-stimulated serum TSH concentrations are reduced somewhat and the type I MDI activities in peripheral tissues are reduced, with a concomitant reduction in T<sub>4</sub>-to-T<sub>3</sub> conversion and a reduction in serum T<sub>3</sub> concentrations [8]. These effects are related to the extent and duration of the caloric deprivation. In severe and prolonged restriction, as in anorexia nervosa, increased cortisol secretion may contribute to the suppression of TSH release. The mechanism(s) mediating the decreased TSH secretion in response to caloric deprivation is not clear. Somatostatin antibody abolishes the decline in rats, suggesting increased somatostatin tone, and TRH does not reverse the acute decline in TSH during fasting [8]. T<sub>4</sub> and FT<sub>4</sub> concentrations are not usually altered significantly in association with caloric deprivation.

#### CIRCADIAN AND SEASONAL RHYTHMS

There is a clear circadian variation in circulating TSH concentrations in animals and in humans. TSH concentrations are low during the daytime, increase in the evening, and peak shortly before sleep [9–11]. Amounts decline slowly during sleep. Table 3 summarizes studies of mean, nadir, and peak serum TSH concentrations in 98 healthy children, ages 5–18 years, and in two cohorts of healthy adults, one younger group (20–27 years, n = 8) and one older (67–84 years, n = 8) [9–11]. TSH is

**Table 2. Changes in thyroid function with aging.<sup>a</sup>**

|                                                     |
|-----------------------------------------------------|
| Decreased TRH secretion                             |
| Decreased TSH response to TRH                       |
| Decreased pituitary (negative) feedback sensitivity |
| Decreased T <sub>4</sub> secretion                  |
| Decreased T <sub>4</sub> disposal                   |
| Decreased (slight) T <sub>4</sub> monodeiodination  |
| Decreased T <sub>3</sub> disposal                   |
| No change in serum TSH, T <sub>4</sub>              |
| Decreased (slight) serum T <sub>3</sub>             |

<sup>a</sup>From ref. 7.

**Table 3. Circadian variation in serum TSH.\***

| Study group and age, years | TSH conc, mIU/L ( $\pm$ SD) |                      |                      |                      | Time  |      |
|----------------------------|-----------------------------|----------------------|----------------------|----------------------|-------|------|
|                            | W                           | Mean                 | Nadir                | Peak                 | Nadir | Peak |
| Children, 5-18             | 98                          | 2.4<br>( $\pm$ 1.0)  | 1.6<br>( $\pm$ 1.0)  | 3.7<br>( $\pm$ 2.0)  | 1500  | 2300 |
| Adults, 20-27              | 8                           | 1.4<br>( $\pm$ 0.4)  | 0.9<br>( $\pm$ 0.3)  | 1.94<br>( $\pm$ 0.5) | 1653  | 0356 |
| Adults, 67-84              | 8                           | 1.01<br>( $\pm$ 0.7) | 0.73<br>( $\pm$ 0.6) | 1.30<br>( $\pm$ 0.9) | 1611  | 0215 |

\*Data from refs. 9-10.

secreted in a pulsatile fashion throughout the day, and the nocturnal TSH surge is associated with increased pulse frequency and pulse amplitude. The diurnal TSH rhythm is modulated by the circadian pacemaker in the suprachiasmatic nucleus, and the circadian rhythm can be advanced or delayed 1-2 h by exposure to light in the late or early part of the night, respectively [11]. Pharmacologic doses of glucocorticoids can inhibit basal TSH secretion and abolish the circadian TSH rhythm, but preventing the cortisol diurnal rhythm with metyrapone does not alter the TSH rhythm [8]. The nocturnal TSH increment is obtunded in nonthyroidal illness, hyperthyroidism, central hypothyroidism, syndromes of hypercortisolism, surgical stress, depressive states, and poorly controlled diabetes mellitus.

The diurnal variation in TSH concentration approximates  $\pm$ 50% (Table 3), so that time of day may influence the measured serum TSH concentration. However, the variation between 0900 and 1600 usually does not exceed 10% [9-11]. The circadian variation in TSH secretion has a minimal effect on serum  $T_4$  concentrations, since the hourly  $T_4$  secretion rate (3-5  $\mu$ g) represents a very small fraction of the extrathyroidal  $T_4$  pool (500-600  $\mu$ g).

There is the known variation in total  $T_4$  amount with the diurnal change in plasma protein concentration due to hemodilution, but there is no significant diurnal change in  $FT_4$  concentration. There may be a seasonal variation in TSH concentrations, with a statistically higher  $T_4$  concentration in winter vs summer, but this variation, too, is minimal [8, 11, 12]. This variation may be due to an effect of cold to accelerate the peripheral metabolism of thyroid hormone during the winter months. There are no data at present to suggest that normative values for serum TSH or  $T_4$  should be seasonally altered.

#### MENSTRUAL CYCLE, PREGNANCY

There is some evidence that estrogens can increase and androgens reduce the TSH response to TRH, but there is no apparent sex-related difference in the magnitude of the diurnal variation in serum TSH [8]. Additionally, as already discussed, estrogens increase and androgens tend to reduce the circulating amount of TBG. The responses of TSH and prolactin to exogenous TRH are greater in women than in men and greater during the preovulatory than in the luteal phase of the menstrual cycle [13]. Women, when hypothyroid, tend to have irregular, anovulatory menstrual cycles and excessive menstrual bleeding [14]. These effects appear related to an obtundation of the ovulatory

lutropin surge. Thus, although there are interactions of gonadal and thyroid hormones across these endocrine systems, there are minimal and transient variations in thyroid-function indicators during the normal menstrual cycle. Total  $T_4$  concentrations may fluctuate slightly because of the transient change in circulating estrogen concentrations and the effect on TBG concentration [15].

In pregnant women, renal clearance of iodide increases because of an increase in the glomerular filtration rate and because of iodide and iodothyronine transfer to the fetus. Serum concentrations of inorganic iodide decrease, and women living in areas of marginal iodine intake (<50  $\mu$ g per day) may manifest absolute or relative iodine deficiency and enlargement of the thyroid gland during pregnancy [15]. Serum concentrations of TBG increase during the first trimester as a result of reduced clearance mediated by an estrogen-induced increase in sialylation of TBG and an estrogen-stimulated increase in its synthesis [15]. The TBG concentration plateaus after 12 to 14 weeks of pregnancy, and there are parallel increases in serum total  $T_4$  and  $T_3$  concentrations. Serum  $FT_4$  concentrations increase slightly during the first trimester, coincident with the first-trimester peak in human chorionic gonadotropin (hCG) concentrations. In general, however, they are lower than in nonpregnant controls.  $T_4$  utilization increases during pregnancy by 25-50%, and increases in the  $T_4$  dosage of this magnitude are necessary in women with hypothyroidism during pregnancy to maintain normal TSH concentrations. The reason for the increased  $T_4$  utilization is not clear. The increase in TBG concentration is associated with an increase in the extrathyroidal pool of  $\sim$ 300  $\mu$ g of  $T_4$ , but this increase is transient during the first trimester. Placental degradation of  $T_4$ , some maternal-to-fetal  $T_4$  transfer, and an increase in maternal  $T_4$  turnover probably are involved [15].

Serum TSH concentrations remain within the normal range in most pregnant women. However, the placenta produces large amounts of hCG, which has some TSH-like bioactivity. hCG production by the placenta is maximal near the end of the first trimester, after which it declines. At the time of peak hCG concentrations there is a transient increase in maternal serum  $FT_4$  concentrations and (or) a transient decrease in serum TSH concentrations [15].

#### POSTURE, IMMOBILIZATION, EXERCISE, AMBULATORY STATUS

The hormonal response to exercise involves increased sympathoadrenal activity, increased somatotropin, corticotropin,  $\beta$ -endorphin, prolactin, vasopressin, and possibly TSH secretion [16, 17]. The increased epinephrine secretion inhibits insulin release, and the corticotropin increases cortisol secretion. The extent of these changes is related to training, nutrition, and state of health; all of the endocrine responses are reduced by exercise training. The thyroid axis aspects are of limited significance and have little impact with regard to thyroid-function testing. Immobilization, posture, and ambulatory status do not influence thyroid function significantly. Body weight and body habitus, in the absence of malnutrition, also are without effect on thyroid function.

#### GEOGRAPHIC AND ENVIRONMENTAL INFLUENCES

The geographic and environment factors influencing thyroid function include iodine intake and temperature. As mentioned earlier, the winter/summer effects on thyroid function are detectable in large studies but are modest in degree. It is not necessary to develop winter/summer calibrators for thyroid testing. There also may be minor variations in normative serum TSH/FT<sub>4</sub> concentrations in tropical vs colder geographic areas, but, again, these are minor in extent.

Subthreshold concentrations of iodine intake in geographic areas of endemic goiter are associated with a variety of alterations in thyroid-function indicators. These include reduced circulating inorganic iodine concentrations, increased thyroid iodine uptake, an increased T<sub>3</sub>/T<sub>4</sub> secretion ratio, an increased serum T<sub>3</sub>/T<sub>4</sub> concentration ratio, decreased total and FT<sub>4</sub> concentrations, increased serum TSH concentrations, and a tendency to goiter [18]. These changes are inversely related in degree to the prevailing iodine intake. Recommended amounts of iodine intake are shown in Table 4 [6].

In severe iodine-deficient areas (<50 µg of iodine intake/day in adults), there is an increased prevalence of goiter, congenital hypothyroidism, neurological and hypothyroid cretinism, and a reduction in mean population IQ [18]. Excessive iodine intake can block thyroid hormone biosynthesis by inhibiting the enzymes involved in the biosynthetic process (the Wolff-Chaikoff effect) [19]. The result is reduced efficiency of T<sub>4</sub> synthesis, reduced T<sub>4</sub> secretion, increased TSH concentrations, goiter, and hypothyroidism if the iodine excess is chronic. The chronic concentrations likely to produce these effects are variable with age (premature infants are most susceptible) and are summarized in Table 4. Most instances of iodine-excess hypothyroidism are due to individual dietary and drug effects, but there is some variation related to geographic availability of high-iodine food-stuffs such as seafood and kelp.

Excess iodine intake may produce a hyperthyroid state in individuals with subclinical autoimmune Graves disease in areas of borderline iodine deficiency [20]. In such instances the prevailing amount of iodine intake is such that the excessive thyroid gland stimulation is not sufficient to produce overt hyperthyroidism until the increased iodine substrate is provided. This phenomenon, referred to as "Jod-Basedow," is uncommon.

#### NONTHYROIDAL ILLNESSES

Systemic disease states, referred to as nonthyroidal illnesses, are associated with a variety of alterations in thyroid hormone

metabolism [19, 20]. These include: (a) reduced serum total and FT<sub>3</sub>; (b) increased serum rT<sub>3</sub>; (c) low, normal, or increased serum T<sub>4</sub>; and (d) normal or low serum TSH.

The changes in thyroid hormone metabolism are related to an inhibition of type I MDI activity, reduced conversion of T<sub>4</sub> to T<sub>3</sub> in peripheral tissues, reduced clearance of rT<sub>3</sub>, and a decreased affinity of TBG for T<sub>4</sub>, which is associated with reduced serum total T<sub>4</sub> but normal FT<sub>4</sub> in most subjects [20]. The normal FT<sub>4</sub> and TSH concentrations in most subjects and the transient nature of the disorder (as patients recover from their acute illness) have led to designation of the disorder as the "euthyroid sick syndrome." The extent of the disorder is related to the severity and duration of the illness. In severe disease there can be associated reductions in TSH and TBG concentrations, and total and free serum T<sub>4</sub> concentrations. Of patients in intensive care units, ~30–50% manifest low amounts of T<sub>3</sub> and T<sub>4</sub>, and low serum T<sub>4</sub> is more frequently seen in severely ill, moribund patients [20]. In patients with certain liver diseases and in patients receiving certain drugs (amiodarone, radiocontrast agents), high serum T<sub>4</sub> concentrations can be seen—related to increased serum TBG concentrations or decreased T<sub>4</sub> metabolism, or both [20].

Recent information has suggested that these thyroid system alterations in nonthyroidal illness are related, at least in part, to increased production of cytokines (including tumor necrosis factor and interleukins [20]), which have been shown to reduce TSH secretion, inhibit T<sub>4</sub> secretion, and inhibit hepatic gene expression of TBG [20]. Caloric deprivation and glucocorticoid hypersecretion may contribute significantly as pathogenetic factors [20–22]. The thyroid dysfunctions associated with nonthyroidal illness are generally considered secondary, adaptive effects, and the patients remain euthyroid. Treatment is focused on the underlying disease.

#### SURGERY, TRAUMA

Acute trauma, including surgery, also is associated with alterations in thyroid-function indicators. The changes are similar to those seen in nonthyroidal medical illness and the pathogenesis is similar, although the process is more acute and recovery may be more rapid [20–24]. Experimental studies are ongoing to determine whether T<sub>3</sub> replacement therapy in the low-T<sub>3</sub> syndrome associated with trauma or surgery may be beneficial.

#### References

1. Dumont JE, Vassart G. Thyroid regulation. In: DeGroot LJ, Besser M, Burger HG, Jameson JL, Loriaux DL, Marshall JC, et al., eds. *Endocrinology*, 3rd ed. Philadelphia: WB Saunders, 1995:543–59.
2. Refetoff S, Nicoloff JT. Thyroid hormone transport and metabolism. In: DeGroot LJ, Besser M, Burger HG, Jameson JL, Loriaux DL, Marshall JC, et al., eds. *Endocrinology*, 3rd ed. Philadelphia: WB Saunders, 1995:560–82.
3. Thorpe-Beeston JG, Nicolaidis KH, McGregor AM. Fetal thyroid function. *Thyroid* 1992;2:207–17.
4. Delange F, Fisher DA. The thyroid gland. In: Brook CGD, ed. *Clinical pediatric endocrinology*, 3rd ed. Oxford: Blackwell Scientific, 1995:397–433.
5. Nelson JC, Clark SJ, Borut DL, Tomei RT, Carlton EI. Age related

**Table 4. Recommended dietary intakes of iodine and probable safe upper limits.\***

| Age                 | Dietary iodine intake, µg/kg per day |             |
|---------------------|--------------------------------------|-------------|
|                     | Recommended                          | Upper limit |
| Premature infants   | 30                                   | 100         |
| Infants 0–6 months  | 15                                   | 150         |
| Infants 0–12 months | 7                                    | 140         |
| Children 1–10 years | 3                                    | 50          |
| Adolescents/adults  | 2                                    | 30          |

\*From ref. 6.

- changes in serum free thyroxine during childhood and adolescence. *J Pediatr* 1993;123:899-905.
6. Fisher DA, Delange F. Thyroid hormone and iodine requirements in man during brain development. In press.
  7. Solomon DH. Effect of aging on thyroid hormone metabolism. In: Wu SY, ed. *Thyroid hormone metabolism*. Oxford: Blackwell Scientific, 1991:267-92.
  8. Scanlon MF. Neuroendocrine control of thyrotropin secretion. In: Braverman LE, Utiger RD, eds. *The thyroid*, 6th ed. Philadelphia: JB Lippincott, 1991:230-56.
  9. Rose SR, Nisula BC. Circadian variation of thyrotropin in childhood. *J Clin Endocrinol Metab* 1989;68:1086-9.
  10. Van Coevorden A, Laurent E, Decoster C, Kerkhofs M, Neve P, VanCauter E, Mockel J. Decreased basal and stimulated thyrotropin secretion in healthy elderly men. *J Clin Endocrinol Metab* 1989;69:177-85.
  11. Van Cauter E, Turek FW. Endocrine and other biological rhythms. In: DeGroot LJ, Besser M, Burger HG, Jameson JL, Loriaux DL, Marshall JC, et al., eds. *Endocrinology*, 3rd ed. Philadelphia: WB Saunders, 1995:2487-548.
  12. Konno N, Morikawa K. Seasonal variation of serum thyrotropin concentration and thyrotropin response to thyrotropin-releasing hormone in patients with primary hypothyroidism on constant replacement dosage of thyroxine. *J Clin Endocrinol Metab* 1982; 54:1118-24.
  13. Beck RP, Fawcett DM, Morcos F. Thyroid function studies in different phases of the menstrual cycle and in women receiving norethindrone with or without estrogen. *Am J Obstet Gynecol* 1972;112:369-73.
  14. Thomas R, Reid RL. Thyroid disease and reproductive dysfunction: a review. *Obstet Gynecol* 1987;70:789-98.
  15. Burrow GN, Fisher DA, Larsen PR. Maternal and fetal thyroid function. *N Engl J Med* 1994;331:1072-8.
  16. Galbo H. Autonomic neuroendocrine responses to exercise. *Scand J Sports Sci* 1986;8:3-17.
  17. Galbo H. Integrated endocrine responses and exercise. In: DeGroot LJ, Besser M, Burger HG, Jameson JL, Loriaux DL, Marshall JC, et al., eds. *Endocrinology*, 3rd ed. Philadelphia: WB Saunders, 1995:2692-701.
  18. Medeiros-Neto G. Iodine deficiency disorders. In: DeGroot LJ, Besser M, Burger HG, Jameson JL, Loriaux DL, Marshall JC, et al., eds. *Endocrinology*, 3rd ed. Philadelphia: WB Saunders, 1995: 821-33.
  19. Roti E, Vagenakis AG. Effect of excess iodide: clinical aspects. In: Braverman LE, Utiger RD, eds. *The thyroid*, 6th ed. Philadelphia: JB Lippincott, 1991:390-402.
  20. Chopra IJ. Nonthyroidal illness syndrome or euthyroid sick syndrome. *Endocr Care*: in press.
  21. Nicoloff JT, LoPresti JS. Nonthyroidal illnesses. In: DeGroot LJ, Besser M, Burger HG, Jameson JL, Loriaux DL, Marshall JC, et al., eds. *Endocrinology*, 3rd ed. Philadelphia: WB Saunders, 1995: 665-75.
  22. Van der Heyden JTM, Doctor R, van Toor H, Wilson JHP, Henne- mann G, Krenning EP. Effects of caloric deprivation on thyroid hormone tissue uptake and generation of low T<sub>3</sub> syndrome. *Am J Physiol* 1986;251:E156-63.
  23. Novitzky D, Human PA, Cooper PKC. Effect of triiodothyronine (T<sub>3</sub>) on myocardial high energy phosphates and lactate after ischemia and cardiopulmonary bypass: an experimental study in baboons. *J Thorac Cardiovasc Surg* 1988;96:600-7.
  24. Novitzky D, Cooper DK, Reichart B. Hemodynamic and metabolic responses to hormonal therapy in brain-dead potential organ donors. *Transplantation* 1987;43:852-5.
